# Supplementary material for: Peanut supplementation affects compositions and functions of gut microbiome in Ugandan children
Source: Royal Society of Chemistry journal article supplement (doi:10.1039/d3fo04645a), 2024-01-01
Supplement: d3fo04645a1.xlsx [file d3fo04645a1.xlsx]

## Sheet: Supplementary Table 1
Sequence reads amounts obtained from genomic sequencing facility and processing for 36 samples
Data processing	1F8D0	1M6D0	2F6D0	2F7D0	2M6D0	2M8D0	3F6D0	3F7D0	3M6D0	3M8D0	KF8D0	KM7D0	1F8D60	1M6D60	2F6D60	2F7D60	2M6D60	2M8D60	3F6D60	3F7D60	3M6D60	3M8D60	KF8D60	KM7D60	1F8D90	1M6D90	2F6D90	2F7D90	2M6D90	2M8D90	3F6D90	3F7D90	3M6D90	3M8D90	KF8D90	KM7D90
Input	10769	38841	28402	28029	47630	24115	42527	51893	81854	49174	52812	33044	33388	70764	55155	41676	59997	36996	39272	50281	74861	35495	36446	40730	17235	63726	46368	93850	70961	48214	45095	87151	116770	78506	41826	40552
Filtered**	9929	35499	26116	25305	44120	21864	39046	46165	73933	44759	47569	29923	30314	64224	50134	37740	53914	33867	35366	44716	66651	32272	32729	36393	15792	56829	41920	83321	63810	43531	40717	77735	104608	70989	37028	36018
%	92.2	91.4	91.95	90.28	92.63	90.67	91.81	88.96	90.32	91.02	90.07	90.56	90.79	90.76	90.9	90.56	89.86	91.54	90.05	88.93	89.03	90.92	89.8	89.35	91.63	89.18	90.41	88.78	89.92	90.29	90.29	89.2	89.58	90.42	88.53	88.82
Merged***	8599	31591	23075	23077	41484	18939	35573	41614	67733	41178	43363	26925	27213	58220	45867	34798	50996	32940	31451	39751	61183	28629	28318	33296	13821	50597	39351	78448	59697	39942	37708	71181	93784	65111	33806	32139
%	79.85	81.33	81.24	82.33	87.1	78.54	83.65	80.19	82.75	83.74	82.11	81.48	81.51	82.27	83.16	83.5	85	89.04	80.09	79.06	81.73	80.66	77.7	81.75	80.19	79.4	84.87	83.59	84.13	82.84	83.62	81.68	80.32	82.94	80.83	79.25
Non-chimeric****	7663	27752	21788	22374	37894	18043	32925	39064	62212	38788	40872	25104	23834	52477	43593	33712	47325	32628	29120	36614	56464	26142	26166	31503	13484	42328	37708	74534	54593	37949	35463	66310	81789	60600	32405	29473
%	71.16	71.45	76.71	79.82	79.56	74.82	77.42	75.28	76	78.88	77.39	75.97	71.38	74.16	79.04	80.89	78.88	88.19	74.15	72.82	75.43	73.65	71.79	77.35	78.24	66.42	81.32	79.42	76.93	78.71	78.64	76.09	70.04	77.19	77.48	72.68
*: Name format of each sample is Village(1 is Naalya, 2 is Nama I, 3 is Nama II, K is Kituba)-Sex(male is M, female is F)-Age(ranged from 6-8)-Day(Day 0 is D0, Day 60 is D60, Day 90 is D90)
**: filter based quality score via DADA2 to cut the low-quality score end
***: merge the paired-end reads into a single nucleotide sequence
****: chimeric reads is that incomplete extension during the PCR results in partial sequence strands that can act as primers in subsequent PCR cycles on similar but non identical sequences, which could be considered as false new species in the analysis
